# Supplementary material for: Insights Into the Molecular Mechanism for Type 2 Diabetes Susceptibility at the KCNQ1 Locus From Temporal Changes in Imprinting Status in Human Islets
Source: PubMed Central journal article supplement — Diabetes. 2013 Feb 14;62(3):987–92. doi: 10.2337/db12-0819 (PMC3581222; doi:10.2337/db12-0819), 2013-02-14

SUPPLEMENTARY DATA

**Supplementary Table 1.** Donor characteristics and sample details for adult human islets and foetal pancreas

| <b>Adult Islets (n=72)</b>    | <b>Mean (range)</b> |
|-------------------------------|---------------------|
| Age (years)                   | 53 (24-75)          |
| BMI (kg/m <sup>2</sup> )      | 27.1 (17.6-36.6)    |
| Islet Purity                  | 91% (83%-99%)       |
| Gender                        | 53% male            |
| <b>Foetal Pancreas (n=18)</b> | <b>Mean (range)</b> |
| Days post-conception          | 79 (42-133)         |

**Supplementary Table 2.** coding variants used to determine imprinting status of genes in the 11p15.5 cluster

| <b>Gene</b>              | <b>Coding Variant</b><br>( <i>major/minor allele</i> ) | <b>Adult islets</b>            |            |                                | <b>Fetal pancreas</b>          |            |                                |
|--------------------------|--------------------------------------------------------|--------------------------------|------------|--------------------------------|--------------------------------|------------|--------------------------------|
|                          |                                                        | <b>Hom</b><br>( <i>major</i> ) | <b>Het</b> | <b>Hom</b><br>( <i>minor</i> ) | <b>Hom</b><br>( <i>major</i> ) | <b>Het</b> | <b>Hom</b><br>( <i>minor</i> ) |
| <b><i>KCNQ1</i></b>      | rs1057128 (G/A)                                        | 51                             | 16         | 3                              | 14                             | 3          | 1                              |
| <b><i>KCNQ1OT1</i></b>   | rs231362 (G/A)                                         | 22                             | 30         | 17                             | 6                              | 9          | 2                              |
| <b><i>PHLDA2</i></b>     | rs13390 (A/G)                                          | 53                             | 13         | 2                              | 15                             | 3          | 0                              |
| <b><i>SLC22A18</i></b>   | rs1129782 (G/C)                                        | 50                             | 14         | 7                              | 14                             | 4          | 0                              |
| <b><i>SLC22A19AS</i></b> | rs367035 (A/G)                                         | 2                              | 1          | 3                              | 3                              | 1          | 3                              |
| <b><i>CDKN1C</i></b>     | del171APVA<br>( <i>ins/del</i> )                       | 34                             | 23         | 9                              | 9                              | 5          | 3                              |

SUPPLEMENTARY DATA

**Supplementary Figure 1.** *SLC22A18AS* is biallelically expressed in both adult and foetal tissues. Electropherogram traces from capillary sequencing of cDNA across a heterozygous coding SNP within *SLC22A18AS* (highlighted in pink). Both samples retain heterozygosity, indicating transcription from both chromosomes.

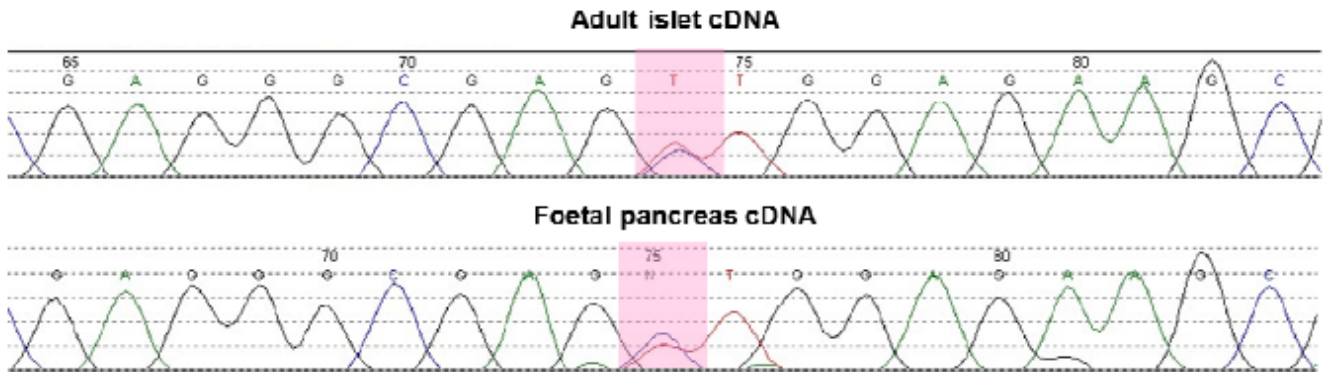

**Supplementary Figure 2.** *KCNQ1* and *KCNQ1OT1* are imprinted in foetal pancreas but expressed biallelically in adult islets. Electropherogram traces from capillary sequencing of cDNA across a heterozygous coding SNP within *KCNQ1* (highlighted in pink). The adult islet sample retains heterozygosity, indicating transcription from both chromosomes, whereas the foetal pancreas sample appears monoallelic – revealing imprinted expression from only one chromosome. The same pattern was seen for all samples at *KCNQ1* and *KCNQ1OT1*

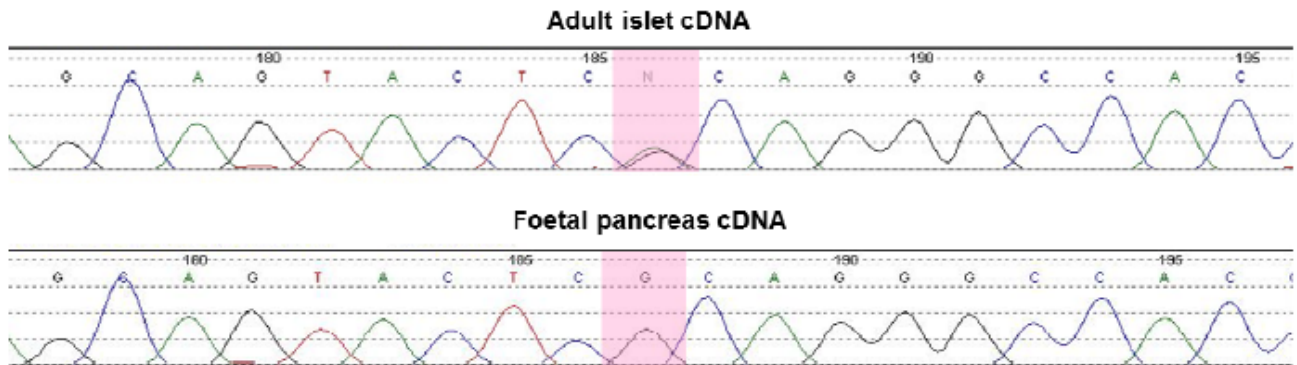

SUPPLEMENTARY DATA

**Supplementary Figure 3.** Methylation according to rs231262 T2D risk genotype. Boxplots show the effect of rs231362 T2D risk allele number (x-axis) upon methylation level (y-axis), separated by tissue type. Boxes represent quartiles; whiskers encompass values within 1.5x interquartile range. No significant associations were identified.

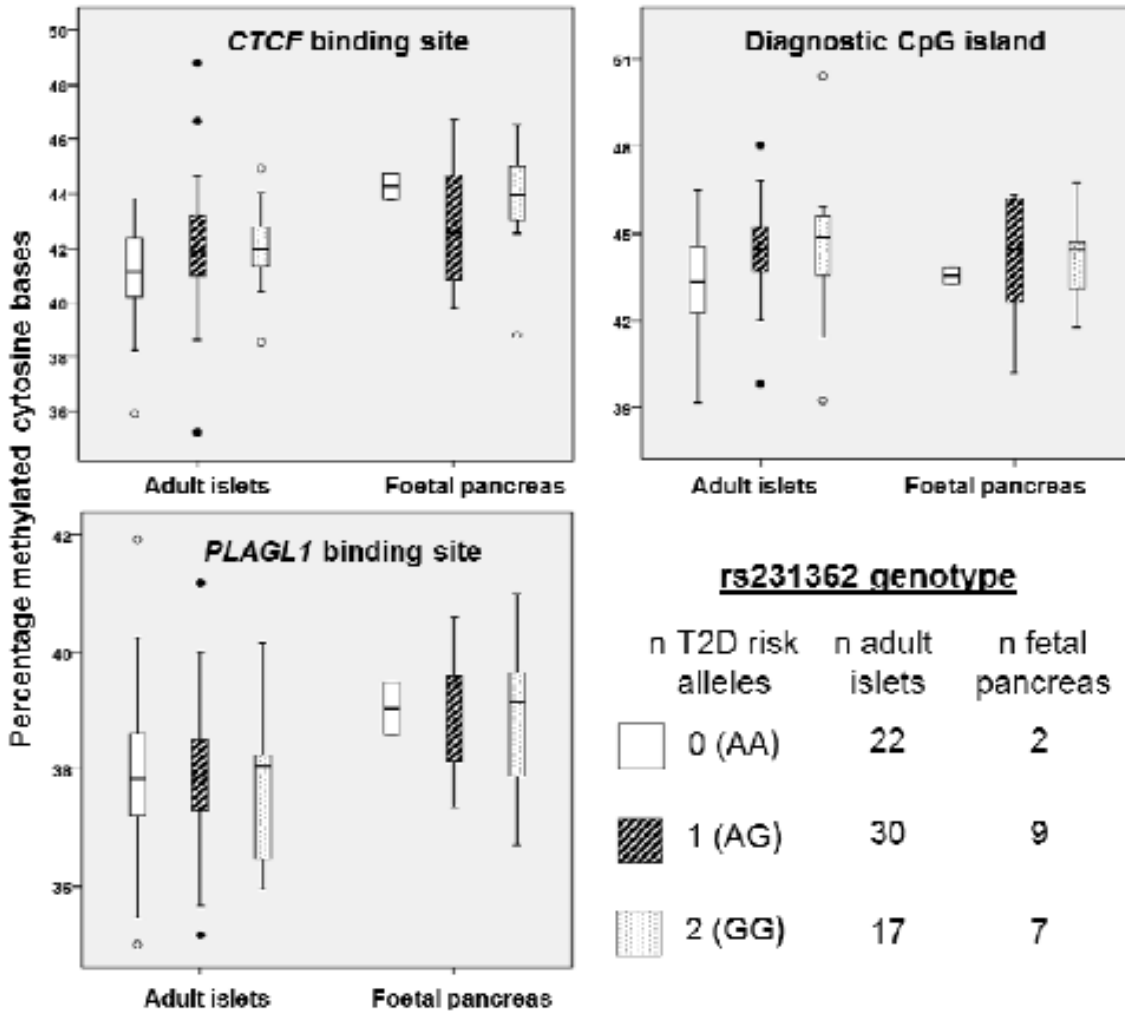

**Supplementary Figure 4.** Methylation at the two candidate assays (rs231354 and rs2283202 regions) according to T2D risk genotypes. Boxplots show the effect of rs231362 and rs2237895 T2D risk allele number (x-axis) upon methylation level (y-axis), separated by tissue type. Boxes represent quartiles; whiskers encompass values within 1.5x interquartile range. No significant associations were identified.

SUPPLEMENTARY DATA

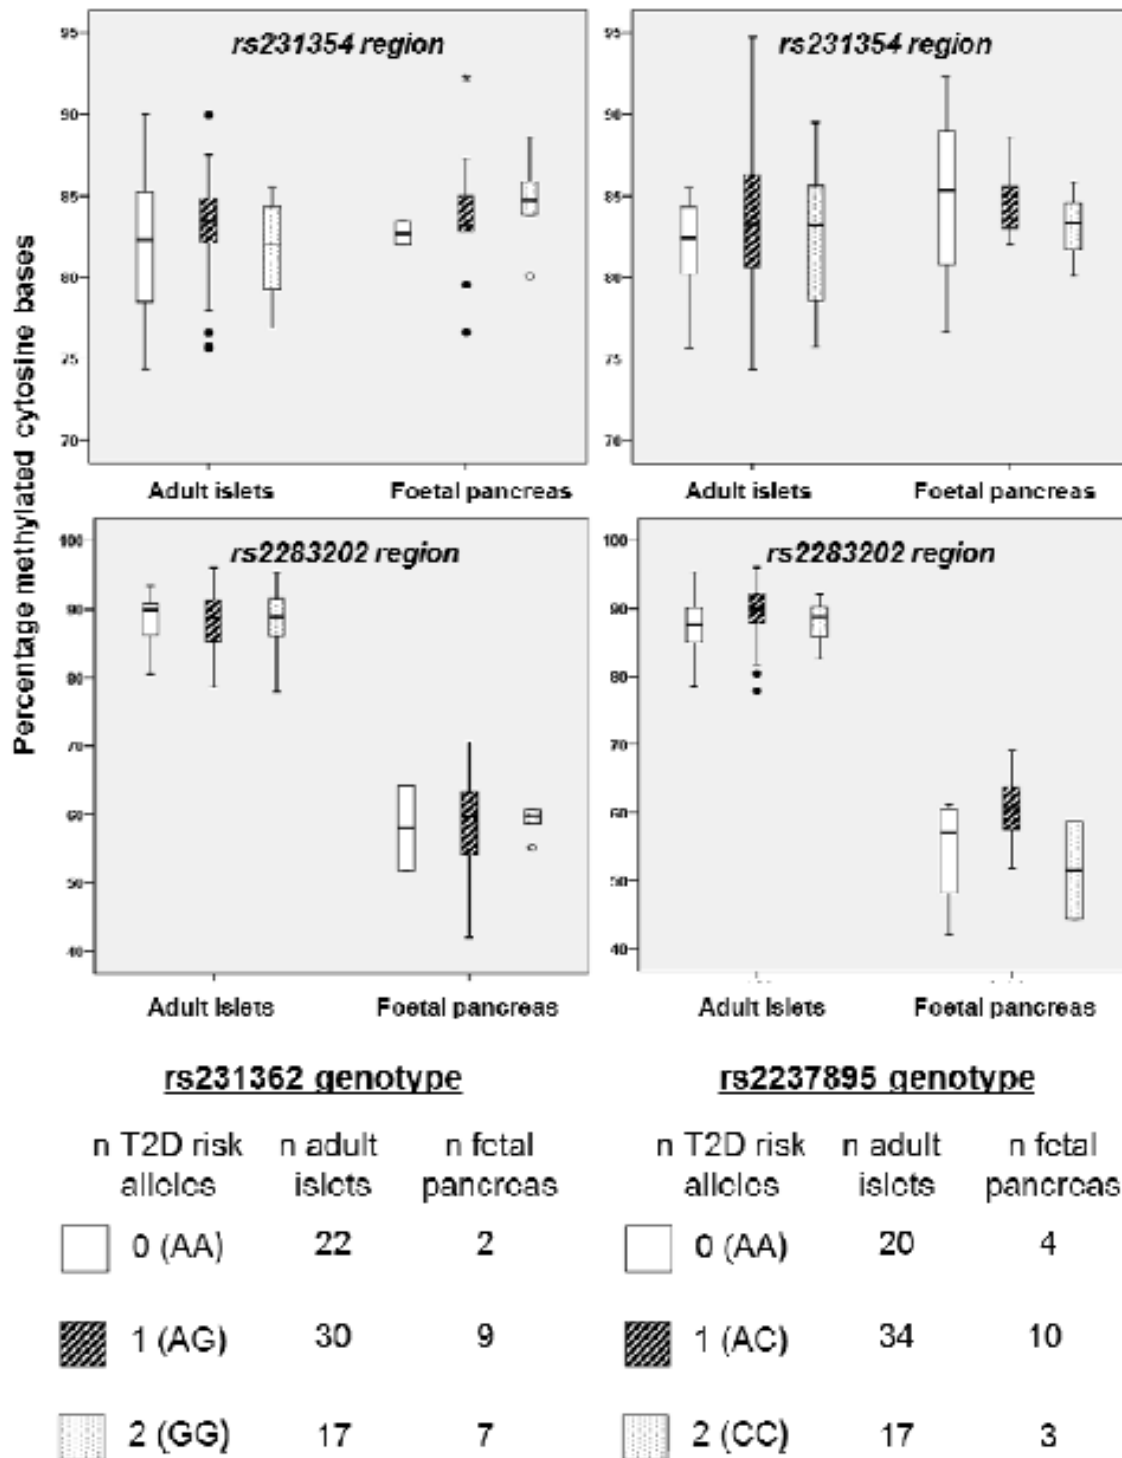

**Supplementary Figure 5.** Total expression according to *rs231362* T2D risk genotype. Boxplots show the effect of *rs231362* T2D risk allele number (x-axis) upon total mRNA expression level (y-axis), separated by tissue type. Boxes represent quartiles; whiskers encompass values within 1.5x interquartile range. There was no evidence for an effect of risk allele number on expression levels of any of the tested genes in either tissue type ( $p > 0.05$  in all cases).

SUPPLEMENTARY DATA

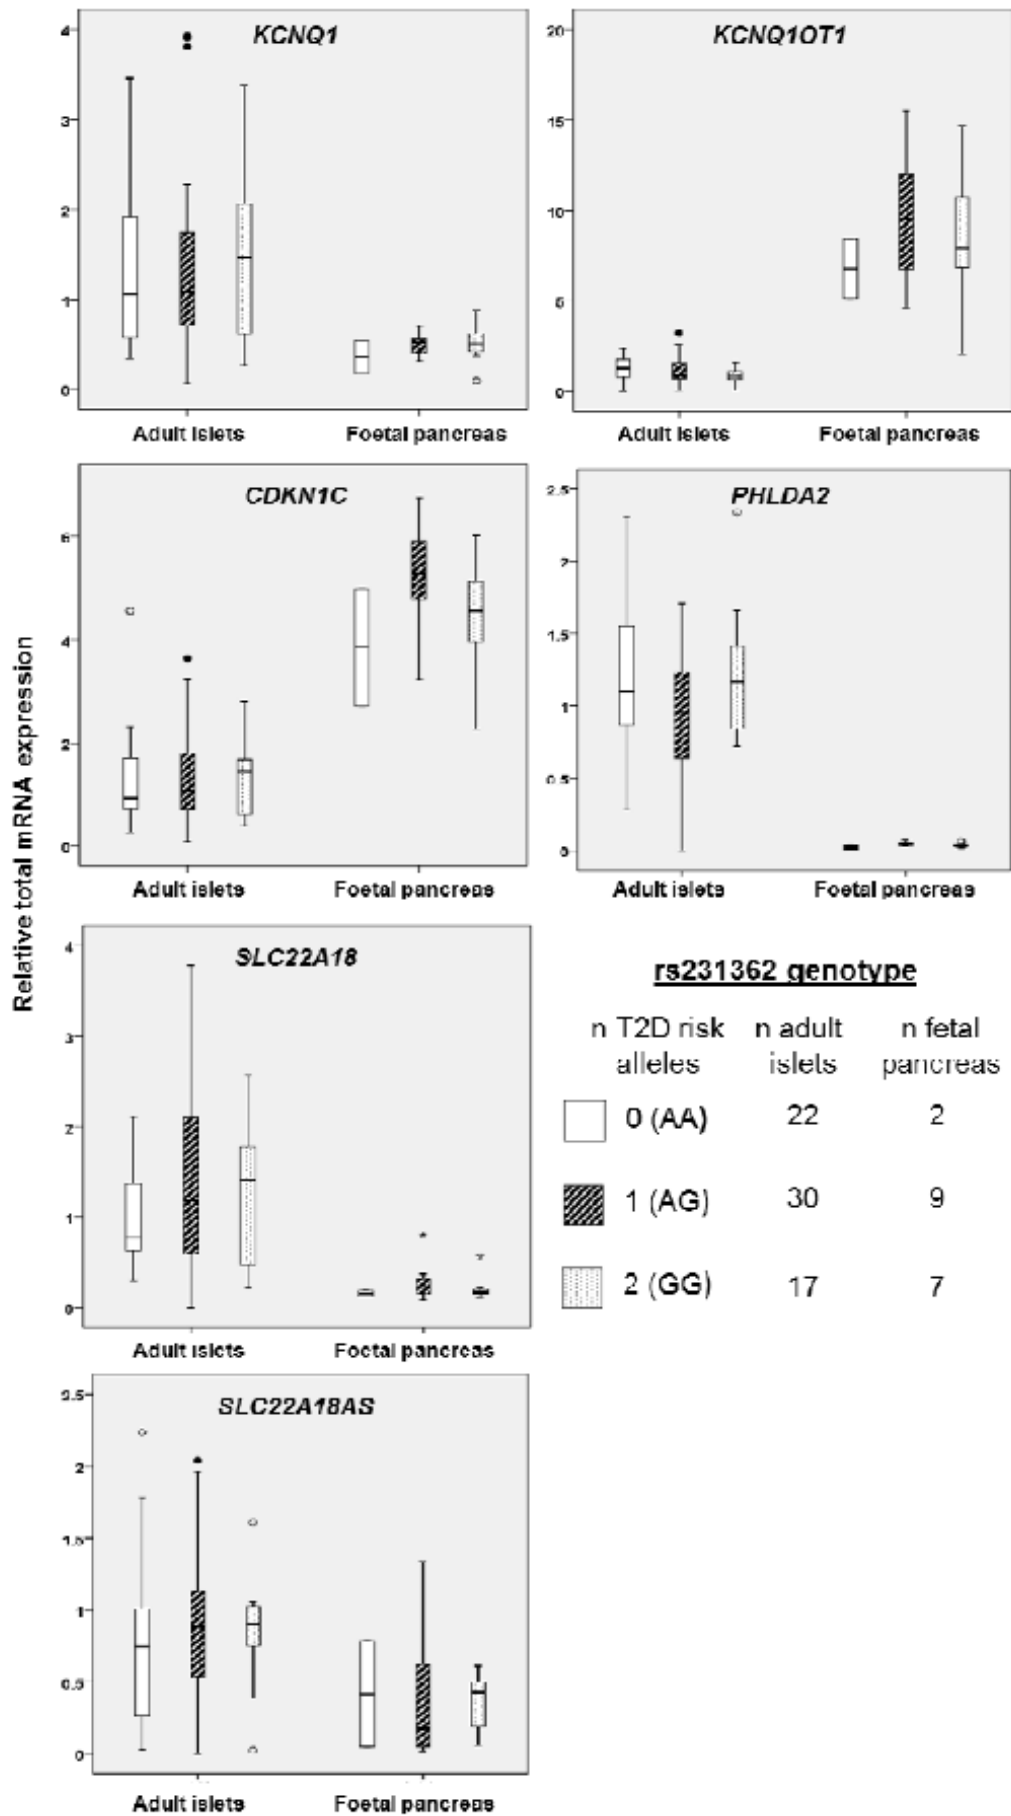

Supplement: supp_db12-0819_DB120819SupplementaryData.pdf [file supp_db12-0819_DB120819SupplementaryData.pdf]
